# Supplementary material for: IL-4 Induced Innate CD8+ T Cells Control Persistent Viral Infection
Source: PubMed Central journal article supplement (PMC4599894; doi:10.1371/journal.ppat.1005193), 2015-10-09

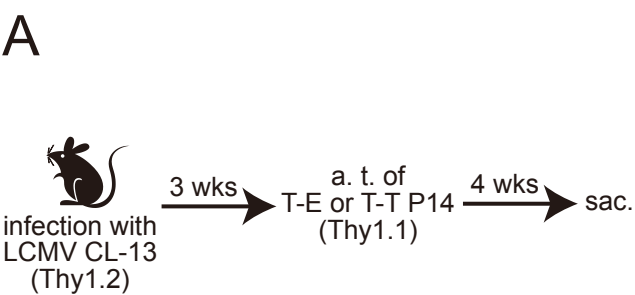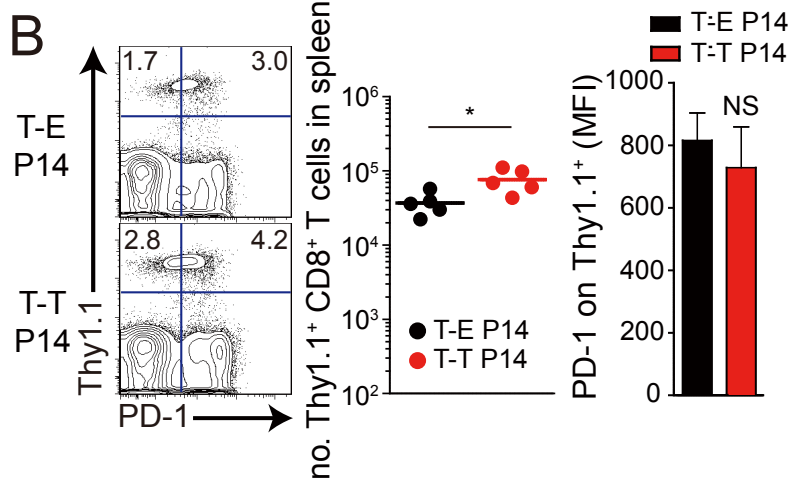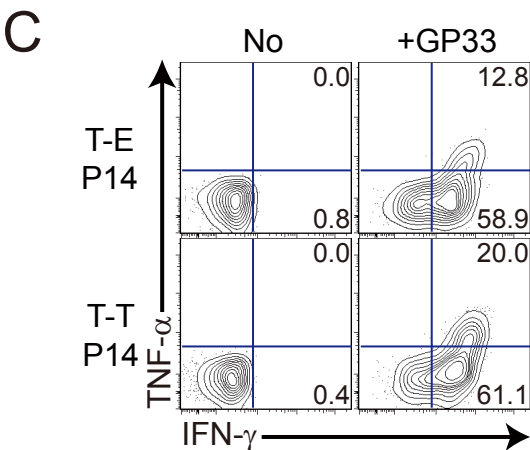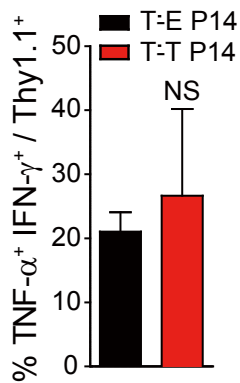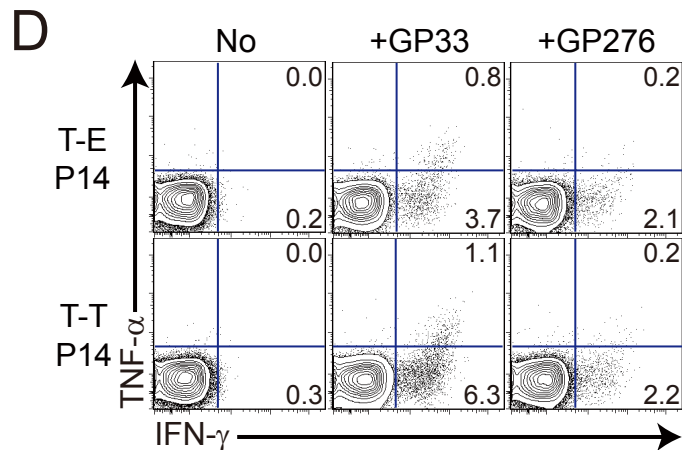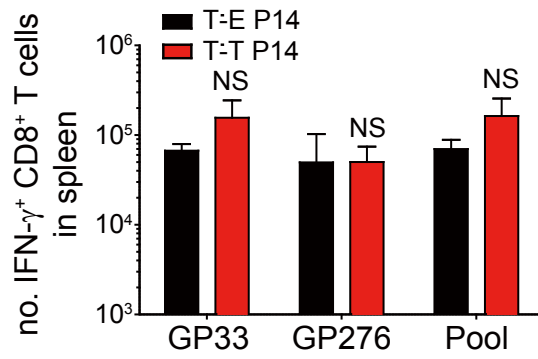

Supplement: ppat.1005193.s004.pdf [file ppat.1005193.s004.pdf]
